# Supplementary material for: Annotating the biomedical literature for the human variome
Source: Oxford University Press journal article supplement (doi:10.1093/database/bat019), 2013-04-12
Supplement: bat019_Supplementary_Data.zip [file bat019_Supplementary_Data.zip]

|       |                          |              |                              |
|-------|--------------------------|--------------|------------------------------|
| T75   | disease 2394 2396        | LS           |                              |
| T76   | cohort-patient 2466 2474 |              | probands                     |
| T73   | mutation 2189 2200       | p.Lys618Ala  |                              |
| T74   | mutation 2331 2342       | p.Lys618Ala  |                              |
| T79   | size 1626 1630           | 2.8%         |                              |
| T77   | cohort-patient 882 890   |              | carriers                     |
| T78   | size 1571 1576           | 2.41%        |                              |
| T29   | cohort-patient 2485 2494 |              | relatives                    |
| T28   | cohort-patient 2100 2114 |              | positive cases               |
| T27   | cohort-patient 1489 1500 |              | individuals                  |
| T26   | cohort-patient 940 951   |              | individuals                  |
| T25   | cohort-patient 2303 2311 |              | patients                     |
| T24   | cohort-patient 1345 1353 |              | patients                     |
| T23   | cohort-patient 990 998   |              | patients                     |
| T22   | cohort-patient 324 332   |              | patients                     |
| T21   | body-part 966 976        |              | colorectal                   |
| T72   | Disorder 2118 2144       |              | microsatellite instability   |
| T71   | size 2096 2099           | two          |                              |
| T20   | disease 219 226          |              | cancers                      |
| T70   | cohort-patient 1548 1552 |              | nine                         |
| T62   | mutation 1367 1378       | p.Lys618Ala  |                              |
| T64   | size 1476 1488           | Twenty-seven |                              |
| T65   | mutation 1527 1538       | p.Lys618Ala  |                              |
| T66   | size 1548 1552           | nine         |                              |
| T67   | size 1579 1584           | seven        |                              |
| T68   | size 1636 1638           | 11           |                              |
| T69   | cohort-patient 1644 1652 |              | controls                     |
| T38   | disease 1827 1829        | LS           |                              |
| T37   | mutation 1748 1759       | p.Lys618Ala  |                              |
| T39   | cohort-patient 1579 1584 |              | seven                        |
| T34   | cohort-patient 1847 1853 |              | family                       |
| T33   | size 2152 2157           | 11.8%        |                              |
| T36   | cohort-patient 689 707   | control      | population                   |
| T35   | cohort-patient 1949 1955 |              | family                       |
| T30   | size 1105 1110           | Three        |                              |
| T61   | size 1342 1344           | 17           |                              |
| T32   | cohort-patient 1830 1838 |              | families                     |
| T60   | body-part 1307 1317      |              | colorectal                   |
| T31   | cohort-patient 1133 1141 |              | families                     |
| T41_2 | Concepts_Ideas 145 173   |              | autosomal dominant inherited |
| T6    | disease 869 876          | tumours      |                              |
| T7    | disease 1318 1324        | tumour       |                              |
| T49   | mutation 755 766         | p.Lys618Ala  |                              |
| T4    | gene 1999 2003           | MSH6         |                              |
| T48   | mutation 653 664         | p.Lys618Ala  |                              |
| T5    | disease 268 275          | tumours      |                              |
| T8    | disease 2176 2183        | tumours      |                              |

|           |                            |                                 |
|-----------|----------------------------|---------------------------------|
| T9        | disease 966 983            | colorectal cancer               |
| T43       | body-part 246 257          | endometrium                     |
| T94       | Physiology 2264 2295       | functional inactivation of MLH1 |
| T93       | mutation 1789 1809         | pathogenic mutations            |
| T42       | body-part 234 244          | colorectum                      |
| T41       | disease 135 137            | LS                              |
| T40       | mutation 31 47             | c.1852_1853AA>GC                |
| T47       | disease 564 566            | LS                              |
| T46       | mutation 405 416           | p.Lys618Ala                     |
| T45       | mutation 387 403           | c.1852_1853AA>GC                |
| T44       | disease 321 323            | LS                              |
| T88       | Concepts_Ideas 1610 1620   | hereditary                      |
| T89       | cohort-patient 2081 2089   | families                        |
| T84       | Disorder 207 218           | early onset                     |
| T85       | cohort-patient 1024 1032   | families                        |
| T86       | Concepts_Ideas 957 965     | sporadic                        |
| T50       | Disorder 839 865           | microsatellite instability      |
| T87       | Concepts_Ideas 1557 1565   | sporadic                        |
| T1        | gene 51 55                 | MLH1                            |
| T9_cancer | disease 977 983            | cancer                          |
| T3        | gene 2291 2295             | MLH1                            |
| T2        | gene 433 437               | MLH1                            |
| T59       | mutation 1217 1228         | p.Lys618Ala                     |
| T10       | disease 985 988            | CRC                             |
| T11       | disease 1566 1569          | CRC                             |
| T12       | disease 1621 1624          | CRC                             |
| T13       | disease 2299 2302          | CRC                             |
| T14       | disease 2462 2465          | CRC                             |
| T52       | size 935 939               | 1034                            |
| T81       | size 1813 1816             | two                             |
| T15       | disease 81 95              | Lynch syndrome                  |
| T80       | size 1654 1659             | 2.68%                           |
| T51       | mutation 920 931           | p.Lys618Ala                     |
| T16       | disease 119 133            | Lynch syndrome                  |
| T54       | size 1000 1003             | 250                             |
| T17       | cohort-patient 1004 1018   | index subjects                  |
| T53       | size 953 956               | 373                             |
| T82       | size 1843 1846             | one                             |
| T18       | size 2146 2150             | 2/17                            |
| T19       | disease 174 180            | cancer                          |
| T56       | cohort-patient 1094 1102   | controls                        |
| T55       | disease 1053 1055          | LS                              |
| T58       | disease 1130 1132          | LS                              |
| T57       | size 1090 1093             | 411                             |
| R42_m     | has Arg1:T28 Arg2:T33      |                                 |
| R29_2     | relatedTo Arg1:T8 Arg2:T73 |                                 |
| R15_1     | has Arg1:T27 Arg2:T65      |                                 |
| R50_1     | has Arg1:T94 Arg2:T13      |                                 |

R9\_1 has Arg1:T31 Arg2:T59  
R32\_m relatedTo Arg1:T13 Arg2:T3  
R43\_1 has Arg1:T41\_2 Arg2:T41  
R47\_2 has Arg1:T72 Arg2:T28  
R48\_1 relatedTo Arg1:T21 Arg2:T10  
R0\_T94\_T3 has Arg1:T94 Arg2:T3  
R49\_2 has Arg1:T23 Arg2:T51  
R20\_m has Arg1:T27 Arg2:T64  
R46\_2 has Arg1:T24 Arg2:T7  
R21\_m has Arg1:T87 Arg2:T11  
R25\_2 has Arg1:T32 Arg2:T37  
R4\_m has Arg1:T41\_2 Arg2:T16  
R18\_m has Arg1:T24 Arg2:T61  
R30\_m has Arg1:T28 Arg2:T8  
R19\_m has Arg1:T24 Arg2:T62  
R13\_m has Arg1:T17 Arg2:T54  
R28\_m has Arg1:T72 Arg2:T8  
R43\_m has Arg1:T32 Arg2:T38  
R12\_m has Arg1:T23 Arg2:T53  
R5\_m has Arg1:T84 Arg2:T20  
R6\_m relatedTo Arg1:T42 Arg2:T20  
R31\_m has Arg1:T76 Arg2:T14  
R40\_m has Arg1:T70 Arg2:T78  
R11\_m has Arg1:T26 Arg2:T52  
R17\_m relatedTo Arg1:T60 Arg2:T7  
R1\_m has Arg1:T1 Arg2:T40  
R41\_m has Arg1:T28 Arg2:T18  
R14\_m has Arg1:T56 Arg2:T57  
R34\_m has Arg1:T86 Arg2:T9  
R16\_m has Arg1:T31 Arg2:T30  
R9\_m has Arg1:T2 Arg2:T45  
R33\_m has Arg1:T25 Arg2:T13  
R24\_m has Arg1:T32 Arg2:T81  
R10\_2 has Arg1:T50 Arg2:T6  
R39\_1 has Arg1:T3 Arg2:T73  
R36\_m has Arg1:T70 Arg2:T66  
R26\_m has Arg1:T34 Arg2:T82  
R51\_1 has Arg1:T41\_2 Arg2:T41  
R15\_m has Arg1:T31 Arg2:T58  
R27\_m has Arg1:T28 Arg2:T71  
R52\_1 has Arg1:T41\_2 Arg2:T16  
R2\_2 relatedTo Arg1:T15 Arg2:T1  
R44\_m has Arg1:T2 Arg2:T46  
R8\_m has Arg1:T22 Arg2:T44  
R45\_m has Arg1:T77 Arg2:T49  
R48\_m has Arg1:T77 Arg2:T6  
R7\_m relatedTo Arg1:T43 Arg2:T20  
R6\_1 has Arg1:T23 Arg2:T9

R39\_m has Arg1:T39 Arg2:T12  
R3\_2 has Arg1:T41\_2 Arg2:T19  
R0\_T21\_T9\_cancer relatedTo Arg1:T21 Arg2:T9\_cancer  
R32\_1 has Arg1:T69 Arg2:T80  
R37\_m has Arg1:T70 Arg2:T11  
R38\_m has Arg1:T39 Arg2:T67  
R23\_m has Arg1:T69 Arg2:T68  
R31\_1 has Arg1:T39 Arg2:T79  
R22\_m has Arg1:T88 Arg2:T12
